# Supplementary material for: Single-cell multiomics sequencing reveals the functional regulatory landscape of early embryos
Source: PubMed Central journal article supplement (PMC7902657; doi:10.1038/s41467-021-21409-8), 2021-02-23
Supplement: 41467_2021_21409_MOESM3_ESM.pdf [file 41467_2021_21409_MOESM3_ESM.pdf]

## Description of Additional Supplementary Files

**Supplementary Data 1:** scNOMeRe-seq Primer Sequences.

**Supplementary Data 2:** Sample and Sequencing Information. Sheet 1. scNOMeRe-seq sample information; Sheet 2-4. RNA-seq, NOMe-seq and BS-seq data sequencing information; Sheet 5-6. NOMe-seq and BS-seq covered WCG/GCH sites information.

**Supplementary Data 3:** ZGA Genes. List of 2-cell embryos significantly upregulated genes, compared to zygotes. The Wald test was used for significance testing in DESeq2. The P values were adjusted for multiple testing using the procedure of Benjamini-Hochberg.

**Supplementary Data 4:** ZGA associated CREs. Sheet 1-2. ZGA genes associated promoter and distal CREs. The significance of the coefficients was calculated with two-tailed Student's t-tests. The P values were further adjusted by the BenjaminiHochberg approach.

**Supplementary Data 5:** DEGs between ICM and TE. The Wald test was used for significance testing in DESeq2. The P values were adjusted for multiple testing using the procedure of BenjaminiHochberg.

**Supplementary Data 6:** ICM and TE associated CREs. Sheet 1-2. ICM/TE-DEGs associated promoter and distal CREs. The significance of the coefficients was calculated with two-tailed Student's t-tests. The P values were further adjusted by the BenjaminiHochberg approach.
